# Supplementary material for: Maternal Plasma Glycerophospholipids LC-PUFA Levels Have a Sex-Specific Association with the Offspring’s Cord Plasma Glycerophospholipids-Fatty Acid Desaturation Indices at Birth
Source: MDPI journal article supplement (doi:10.3390/ijerph192214850), 2022-11-11
Supplement: s1 [file s1]

**Table S1. Nutritional questionnaire results**

| <b>Intakes/day</b>                     | <b>Mothers of male offspring</b> | <b>Mothers of female offspring</b> |
|----------------------------------------|----------------------------------|------------------------------------|
|                                        | (n=73)                           | (n=80)                             |
| <b>Energy (kcal/day)</b>               | 1988 ± 490                       | 1995 ± 550                         |
| <b>Carbohydrates (%)</b>               | 62 ± 8.1                         | 64 ± 5.7                           |
| <b>Proteins (%)</b>                    | 12 ± 1.9                         | 12 ± 1.5                           |
| <b>Lipids (%)</b>                      | 26 ± 5.1                         | 24 ± 8.1                           |
| <b>Saturated Fatty acids (%)</b>       | 9.4 ± 2.9                        | 9.8 ± 5.9                          |
| <b>Monounsaturated fatty acids (%)</b> | 6.4 ± 2.1                        | 7.1 ± 3.4                          |
| <b>Linoleic acid (%), n-6</b>          | 9.1 ± 4.1                        | 9.8 ± 3.1                          |
| <b>Alpha-Linolenic acid (%), n3</b>    | 0.2 ± 0.05                       | 0.1 ± 0.02                         |
| <b>Gamma-Linolenic acid (%), n6</b>    | 0.01 ± 0.05                      | 0.01 ± 0.05                        |
| <b>Eicosapentaenoic acid (g), n3</b>   | 0.01 ± 0.001                     | 0.01 ± 0.001                       |
| <b>Docosahexaenoic acid (g), n3</b>    | 0.02 ± 0.001                     | 0.018 ± 0.01                       |

**Data are expressed as mean ± SD, for carbohydrates, proteins, and lipids percentage of total caloric intake as indicated**

**Table S2. Correlation between plasma GP-FA% of mothers and cord blood of their male new-borns**

| <b>FA (%)</b>    | <b>r</b> | <b>CI 95%</b>   | <b>P-value</b> |
|------------------|----------|-----------------|----------------|
| <b>SFA</b>       |          |                 |                |
| C14              | 0.53     | 0.34 to 0.68    | <0.0001        |
| C16              | 0.33     | 0.11 to 0.52    | 0.0044         |
| C18              | 0.07     | -0.16 to 0.29   | 0.544          |
| <b>MUFA</b>      |          |                 |                |
| C16:1n7          | 0.19     | -0.04 to 0.41   | 0.101          |
| C18:1n9          | 0.25     | 0.02 to 0.46    | 0.033          |
| <b>n-6 PUFA</b>  |          |                 |                |
| C18:2n6 (LA)     | 0.32     | 0.09 to 0.51    | 0.007          |
| C20:3n6 (DHGLA)  | 0.44     | 0.23 to 0.60    | 0.0001         |
| C20:4n6 (ARA)    | 0.24     | 0.008 to 0.44   | 0.043          |
| <b>n-3 PUFA</b>  |          |                 |                |
| C20:5 (EPA)      | 0.11     | -0.12 to 0.33   | 0.351          |
| C22:5 (DPA)      | 0.16     | -0.07 to 0.3745 | 0.182          |
| C22:6 (DHA)      | 0.34     | 0.12 to 0.53    | 0.004          |
| $\Sigma$ SFA     | 0.09     | -0.15 to 0.32   | 0.457          |
| $\Sigma$ MUFA    | 0.25     | 0.025 to 0.46   | 0.031          |
| $\Sigma$ PUFA    | 0.24     | 0.004 to 0.45   | 0.04           |
| $\Sigma$ n-6     | 0.23     | -0.01 to 0.44   | 0.046          |
| $\Sigma$ n-3     | 0.42     | 0.21 to 0.59    | 0.0003         |
| $\Sigma$ n-6/n-3 | 0.36     | 0.14 to 0.55    | 0.002          |

**Table S3. Relationship between plasma GP-FA% of mothers and cord blood of their female new-borns**

| <b>FA (%)</b>   | <b>r</b> | <b>CI 95%</b>    | <b>P-value</b> |
|-----------------|----------|------------------|----------------|
| <b>SFA</b>      |          |                  |                |
| C14             | 0.363    | 0.16 to 0.54     | 0.001          |
| C16             | 0.225    | 0.004 to 0.425   | 0.04           |
| C18             | 0.333    | 0.122 to 0.515   | 0.003          |
| <b>MUFA</b>     |          |                  |                |
| C16:1n7         | 0.359    | 0.149 to 0.539   | 0.0012         |
| C18:1n9         | 0.444    | 0.245 to 0.605   | <0.0001        |
| <b>PUFA n-6</b> |          |                  |                |
| C18:2n6 (LA)    | 0.349    | 0.140 to 0.529   | 0.0015         |
| C20:3n6 (DHGLA) | 0.319    | 0.106 to 0.505   | 0.004          |
| C20:4n6 (ARA)   | 0.302    | 0.08 to 0.492    | 0.007          |
| <b>PUFA n-3</b> |          |                  |                |
| C20:5 (EPA)     | 0.137    | -0.086 to 0.346  | 0.226          |
| C22:5 (DPA)     | 0.356    | 0.144 to 0.536   | 0.0014         |
| C22:6 (DHA)     | 0.592    | 0.428 to 0.718   | <0.0001        |
| <b>ΣSFA</b>     | 0.416    | 0.216 to 0.582   | 0.0001         |
| <b>ΣMUFA</b>    | 0.393    | 0.191 to 0.565   | 0.0003         |
| <b>ΣPUFA</b>    | 0.338    | 0.126 to 0.519   | 0.0022         |
| <b>Σn-6</b>     | 0.259    | 0.042 to 0.453   | 0.02           |
| <b>Σn-3</b>     | 0.487    | 0.2998 to 0.6387 | <0.0001        |
| <b>Σn-6/n-3</b> | 0.417    | 0.217 to 0.583   | 0.0001         |
